# Supplementary material for: Genome-wide identification of drought-responsive microRNAs in two sets of Malus from interspecific hybrid progenies
Source: PubMed Central journal article supplement (PMC6555824; doi:10.1038/s41438-019-0157-z), 2019-06-08
Supplement: 41438_2019_157_MOESM2_ESM.pdf [file 41438_2019_157_MOESM2_ESM.pdf]

**a****miR156**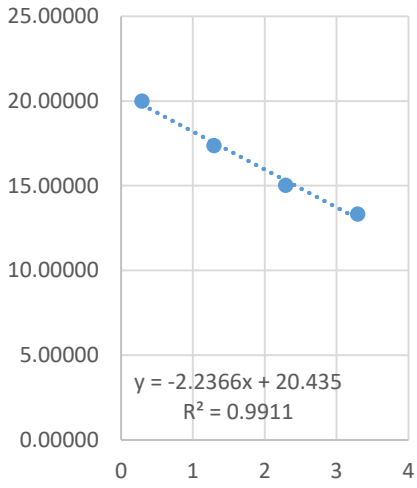**miR395**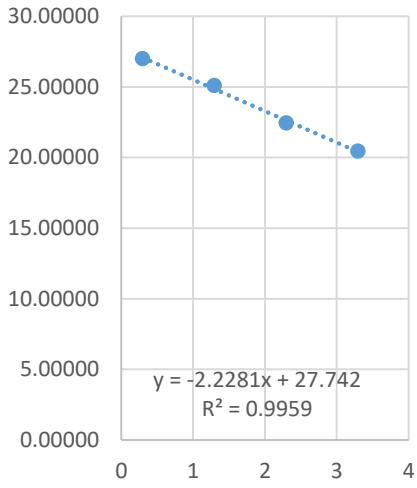**miR408a**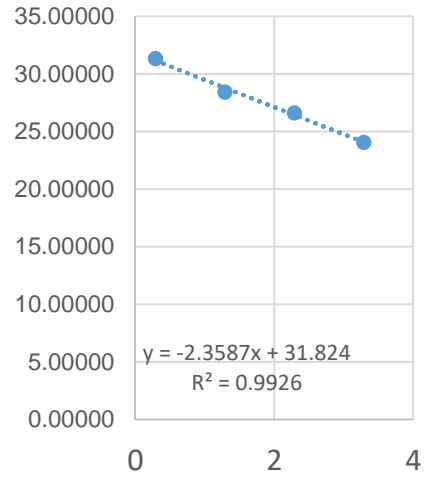**miR5225**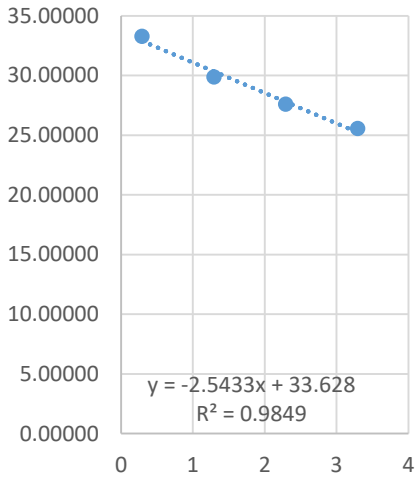**miRn-101**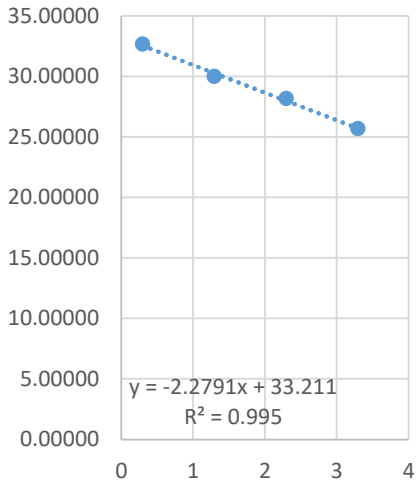**miRn-157**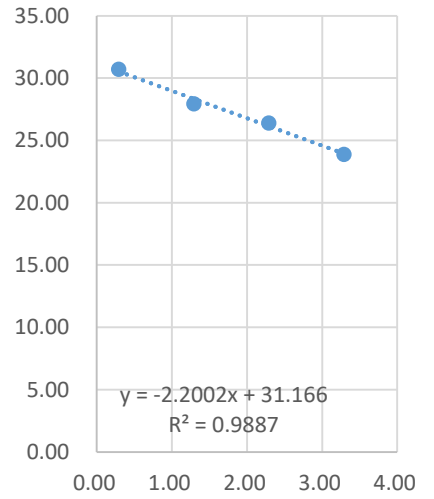**miRn-158**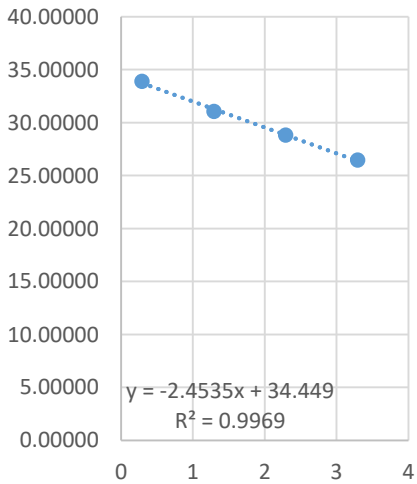**miRn-249**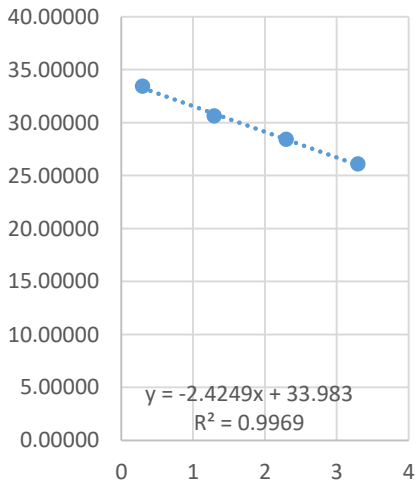**MDH**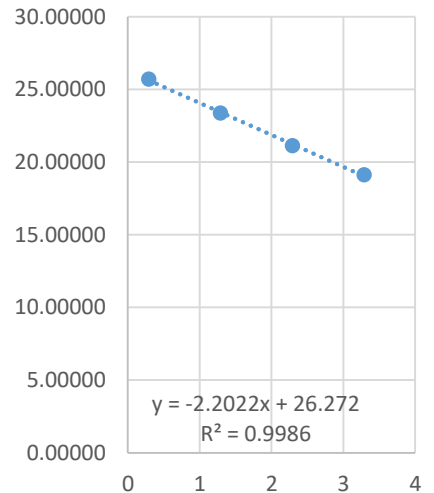

**b**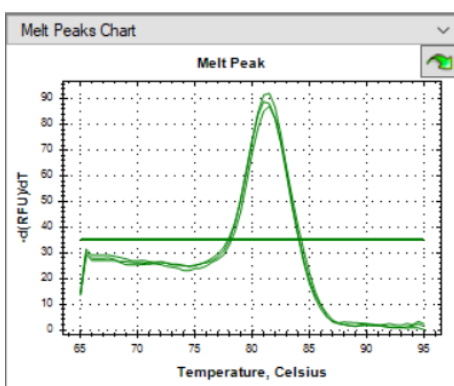**miR156**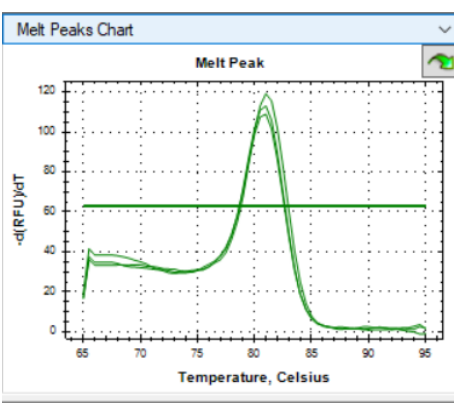**miR395**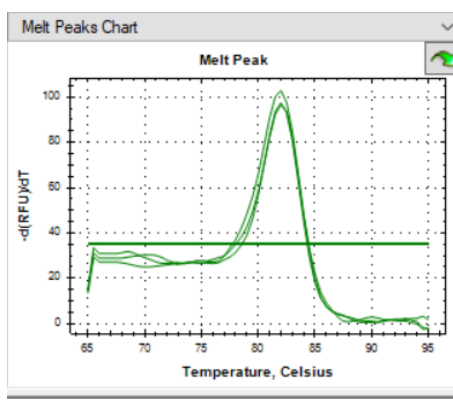**miR408a**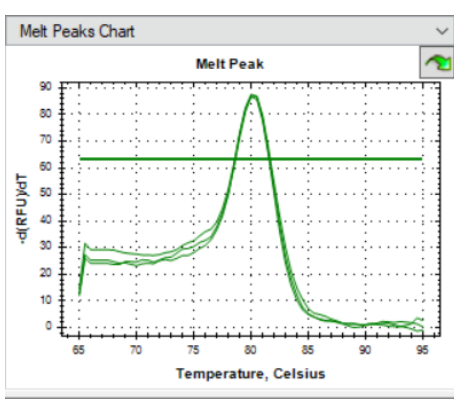**miR5225**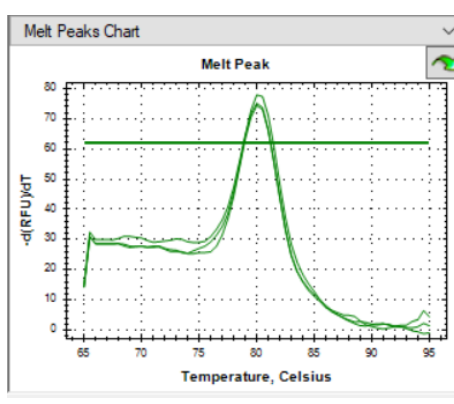**miRn-101**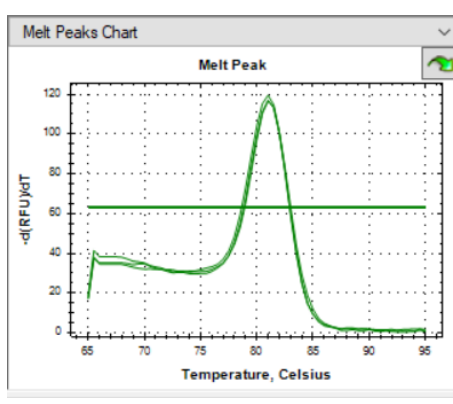**miRn-157**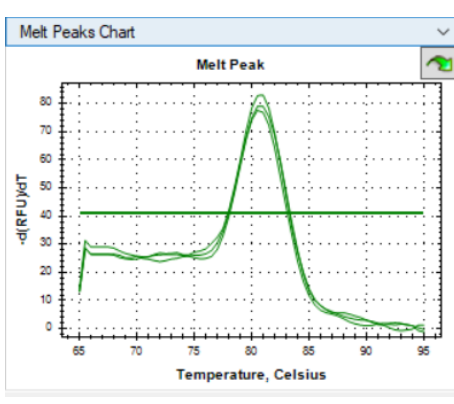**miRn-158**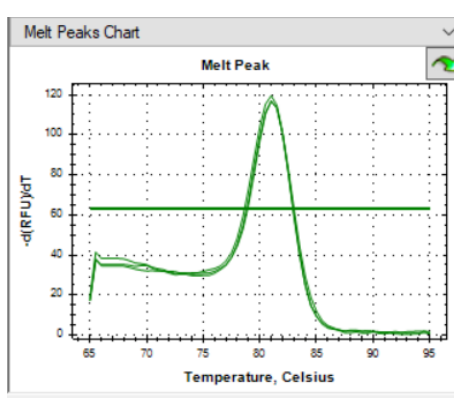**miRn-249**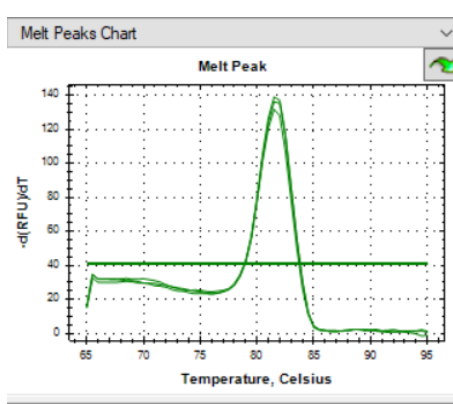**MDH**
